# Supplementary material for: Short and Concise Peer-to-Peer Teaching—Example of a Successful Antibiotic Stewardship Intervention to Increase Iv to Po Conversion
Source: MDPI journal article supplement (doi:10.3390/antibiotics11030402), 2022-03-17
Supplement: s1 [file s1]

# Antibiotic therapies on the ward

**Not everyone needs i.v. therapy!**

# Uncomplicated urinary tract infection

- Oral whenever possible !
- as short term as possible !
- Quinolones and cephalosporins: OUT!

| Substance             | Dose            | Duration |
|-----------------------|-----------------|----------|
| Fosfomycin-Trometamol | 300mg 1 per day | 1 Day    |
| Nitrofurantoin        | 50mg 4 per day  | 7 Days   |
| Nitrofurantoin RT     | 100mg 2 per day | 5 Days   |

In patients with diabetes mellitus without other relevant diseases/complicating factors, urinary tract infections can be considered uncomplicated if the metabolic situation is stable

# Pyelonephritis

- Mild and moderately severe courses of pyelonephritis should be treated with oral antibiotics
  - antibiotic therapy for 5 to 10 days
  - Oral: cefpodoxime, ciprofloxacin, levofloxacin
- severe infections with accompanying systemic symptoms, such as nausea, vomiting, or circulatory instability
  - parenteral: ceftriaxone, ciprofloxacin, levofloxacin

# Pneumonia – Community acquired

## Mild severity

- CRB-65: 0
- oxygenation not altered  $\text{spO}_2 > 89\%$
- no decompensated comorbidity

## Moderate severity

- between mild and severe

## Severe pneumonia

- severe sepsis / septic shock
- respiratory insufficiency
- decompensated comorbidity

# Pneumonia – Community acquired

- Microbiological diagnostics:
  - at least 2 BK pairs
  - Urine AG test for Legionella
  - adequate sputum or TS/BS/BAL
- seasonal PCR for influenza (!)
- no (!) multiplex PCR for viral/bacterial pathogens

# Pneumonia – Community acquired

| Disease Severity |                                                            | Therapy                     |                          |                                                             |
|------------------|------------------------------------------------------------|-----------------------------|--------------------------|-------------------------------------------------------------|
|                  |                                                            | 1st Choice                  |                          | 2nd Choice                                                  |
| <b>p.o.</b>      | <b>Mild Pneumonia without comorbidity</b>                  | Amoxicillin                 |                          | Moxifloxacin, Levofloxacin                                  |
|                  | <b>oral therapy</b>                                        |                             |                          | Clarithromycin, Azithromycin                                |
|                  |                                                            |                             |                          | Doxycycline                                                 |
|                  | <b>Mild Pneumonia with comorbidity</b>                     | Amoxicillin/Clavulanic Acid |                          | Moxifloxacin, Levofloxacin                                  |
|                  | chronic heart disease                                      |                             |                          |                                                             |
|                  | CNS disease with dysphagy                                  |                             |                          |                                                             |
|                  | COPD                                                       |                             |                          |                                                             |
|                  | reduced mobility                                           |                             |                          |                                                             |
| <b>i.v. –</b>    | <b>Moderate Pneumonia</b>                                  | Amoxicillin/Clavulanic Acid | w/wo Makrolid for 3 days | Moxifloacin, Levofloxacin                                   |
| <b>p.o.</b>      | <b>start with iv - sequential oral therapy</b>             | Ampicillin/Sulbactam        | w/wo Makrolid for 3 days |                                                             |
|                  |                                                            | Cefuroxime                  | w/wo Makrolid for 3 days |                                                             |
|                  |                                                            | Ceftriaxone                 | w/wo Makrolid for 3 days |                                                             |
|                  |                                                            | Cefotaxime                  | w/wo Makrolid for 3 days |                                                             |
| <b>i.v.</b>      | <b>Severe Pneumonia</b>                                    | Piperacillin/Tazobactam     | with Makrolid for 3 days | Moxifloxacin, Levofloxacin (no monotherapy in septic shock) |
|                  | <b>start with iv - sequential oral therapy if possible</b> | Ceftriaxone                 | with Makrolid for 3 days |                                                             |
|                  |                                                            | Cefotaxime                  | with Makrolid for 3 days |                                                             |

# Pneumonia – Community acquired

| Disease Severity                                           | Therapy                     |                          |                                                             |
|------------------------------------------------------------|-----------------------------|--------------------------|-------------------------------------------------------------|
|                                                            | 1st Choice                  |                          | 2nd Choice                                                  |
| <b>Mild Pneumonia without comorbidity</b>                  | Amoxicillin                 |                          | Moxifloxacin, Levofloxacin                                  |
| <b>oral therapy</b>                                        |                             |                          | Clarithromycin, Azithromycin                                |
|                                                            |                             |                          | Doxycycline                                                 |
| <b>Mild Pneumonia with comorbidity</b>                     | Amoxicillin/Clavulanic Acid |                          | Moxifloxacin, Levofloxacin                                  |
| <b>oral therapy</b>                                        |                             |                          |                                                             |
| chronic heart disease                                      |                             |                          |                                                             |
| CNS disease with dysphagy                                  |                             |                          |                                                             |
| COPD                                                       |                             |                          |                                                             |
| reduced mobility                                           |                             |                          |                                                             |
| <b>Moderate Pneumonia</b>                                  | Amoxicillin/Clavulanic Acid | w/wo Makrolid for 3 days | Moxifloacin, Levofloxacin                                   |
| <b>start with iv - sequential oral therapy</b>             | Ampicillin/Sulbactam        | w/wo Makrolid for 3 days |                                                             |
|                                                            | Cefuroxime                  | w/wo Makrolid for 3 days |                                                             |
|                                                            | Ceftriaxone                 | w/wo Makrolid for 3 days |                                                             |
|                                                            | Cefotaxime                  | w/wo Makrolid for 3 days |                                                             |
| <b>Severe Pneumonia</b>                                    | Piperacillin/Tazobactam     | with Makrolid for 3 days | Moxifloxacin, Levofloxacin (no monotherapy in septic shock) |
| <b>start with iv - sequential oral therapy if possible</b> | Ceftriaxone                 | with Makrolid for 3 days |                                                             |
|                                                            | Cefotaxime                  | with Makrolid for 3 days |                                                             |

**Pathogen spectrum basically the same for all severity levels**

# Pneumonia – Community acquired

- Mild pneumonia with defined comorbidity
- Combination penicillin with BLI:
  - Spectrum expansion against  $\beta$ -lactamase-producing *S. aureus*, *H. influenzae*, and enterobacteria
  - Caution Unacid: dose of penicillin component too low
- Clarithromycin?
  - Initial combination for three days
  - then discontinue after negative rapid Legionella test
  - **P.o. bioavailability extremely good (also Clinda and Levo)!**



# Pneumonia – Community acquired

## Duration :

- mild to moderate CAP: 5-7 days, shorter may be possible.

- before end of therapy always clinical stabilization for at least 2 days

- oral sequential therapy or directly oral!

## Severe CAP: up to 7 days

- before end of therapy always clinical stabilization for at least 2 days

- oral sequential therapy if necessary

- initially at least 3 days parenterally

# Oral sequential therapy: criteria

- Heart rate < 100 / min
- Respiratory rate < 25 / min
- Systolic blood pressure > 90 mmHg
- Body temperature < 37.8 oC
- Ability to take in food orally
- Normal state of consciousness
- No hypoxemia (SpO<sub>2</sub> > 90%, PaO<sub>2</sub> > 60 mmHg)
